# Supplementary material for: Histogram Distortion Bias in Consumer Choices
Source: Atypon-hosted journal article supplement (doi:10.1287/mnsc.2022.4306), 2022-05-05
Supplement: mnsc.2022.4306.sm2.zip [file experiment instruction sample 2.pdf › HDB Final Data/experiment/experiment instruction sample 2.pdf]

## intro

Thank you for participating this study that will take ~1 min.

We are interested in your everyday decision-making and you will be shown 3 simple decisions below.

Please note that each decision is **independent of each other**. In other words, you **do not** need to consider any previous choices when making a new one.

Please take your time and read everything carefully.

## D1

Imagine that you just won a **free lottery ticket** at your local grocery store. With the lottery ticket, you can participate in **one of the two games** the store offered. Each game has its own expected payoff.

Below are two graphs showing **the probability of winning a particular amount of money**. The length of the bar in the graphs show the probability of winning a certain amount of money (longer bars mean higher probabilities).

Please choose **one of the lottery games** to participate.

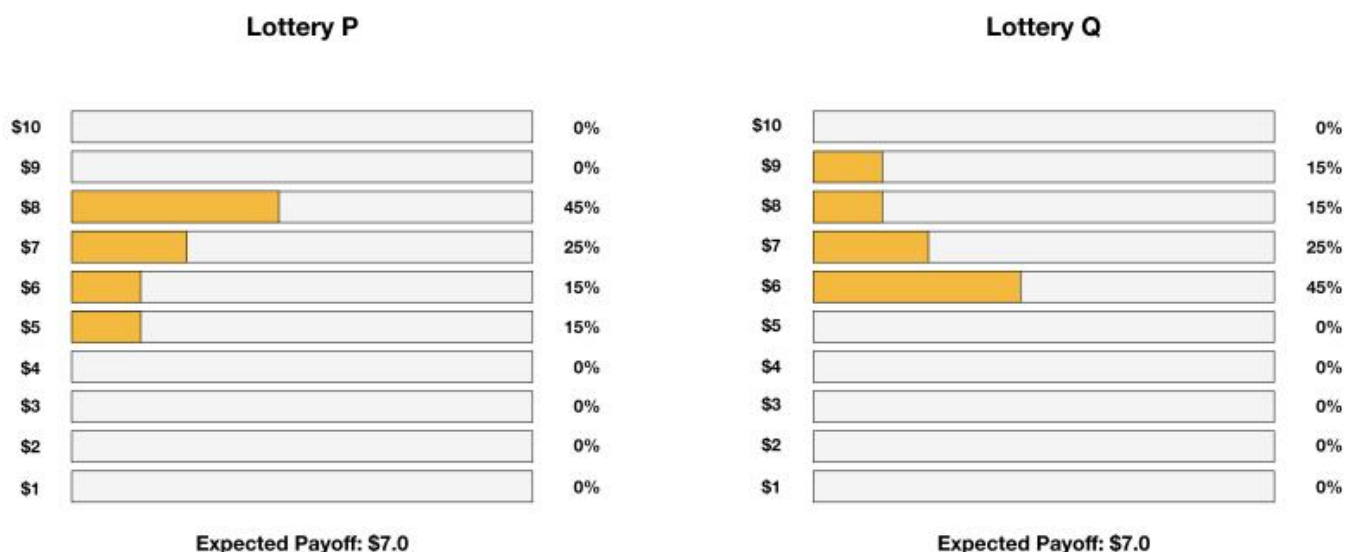

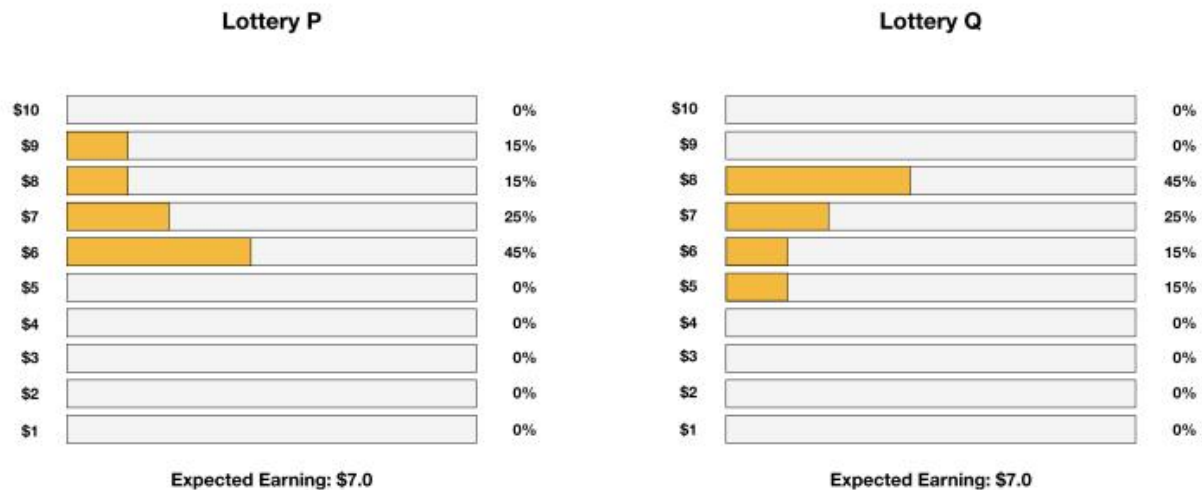

Which lottery do you prefer to participate?

- ☐ Lottery P
- ☐ Lottery Q

06

**D2**

Imagine that you just won a **free lottery ticket** at your local grocery store. With the lottery ticket, you can participate in **one of the two games** the store offered. Each game has its own expected payoff.

Below are two graphs showing **the probability of winning a particular amount of money**. The length of the bar in the graphs show the probability of winning a certain amount of money (longer bars mean higher probabilities).

Please choose **one of the lottery games** to participate.

**Lottery P**

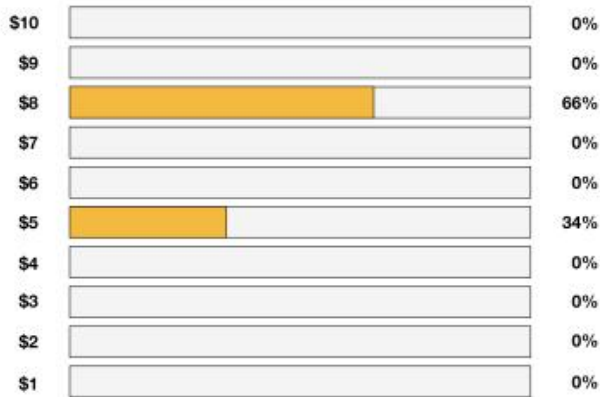

**Lottery Q**

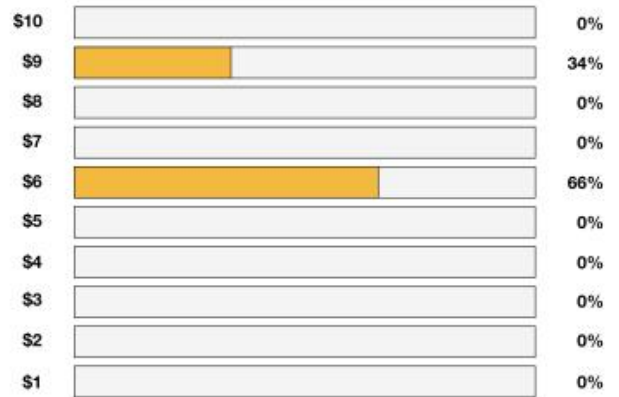

**Lottery P**

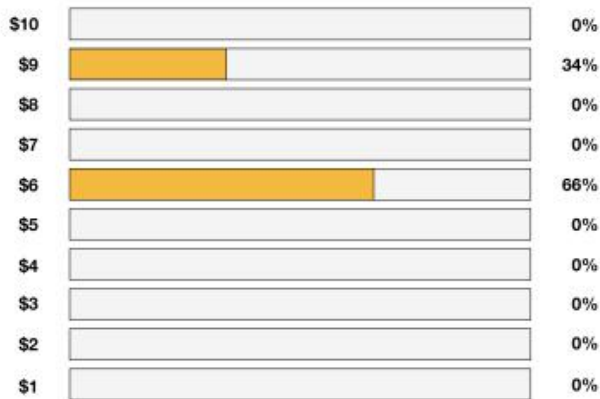

**Lottery Q**

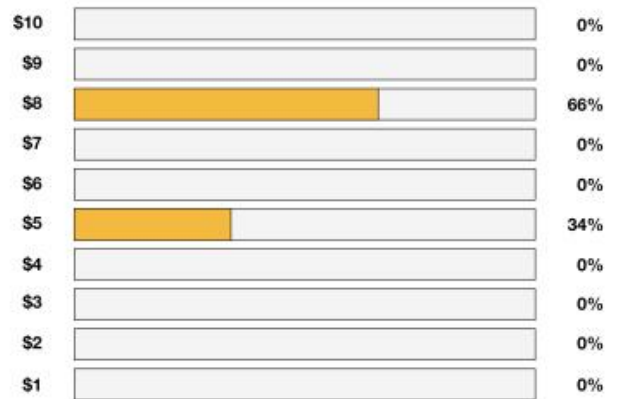

Which lottery do you prefer to participate?

☐ Lottery P

☐ Lottery Q

06

D3

Imagine that you just won a **free lottery ticket** at your local grocery store. With the lottery ticket, you can participate in **one of the two games** the store offered. Each game has its own expected payoff.

Below are two graphs showing **the probability of winning a particular amount of money**. The length of the bar in the graphs show the probability of winning a certain amount of money (longer bars mean higher probabilities).

Please choose **one of the lottery games** to participate.

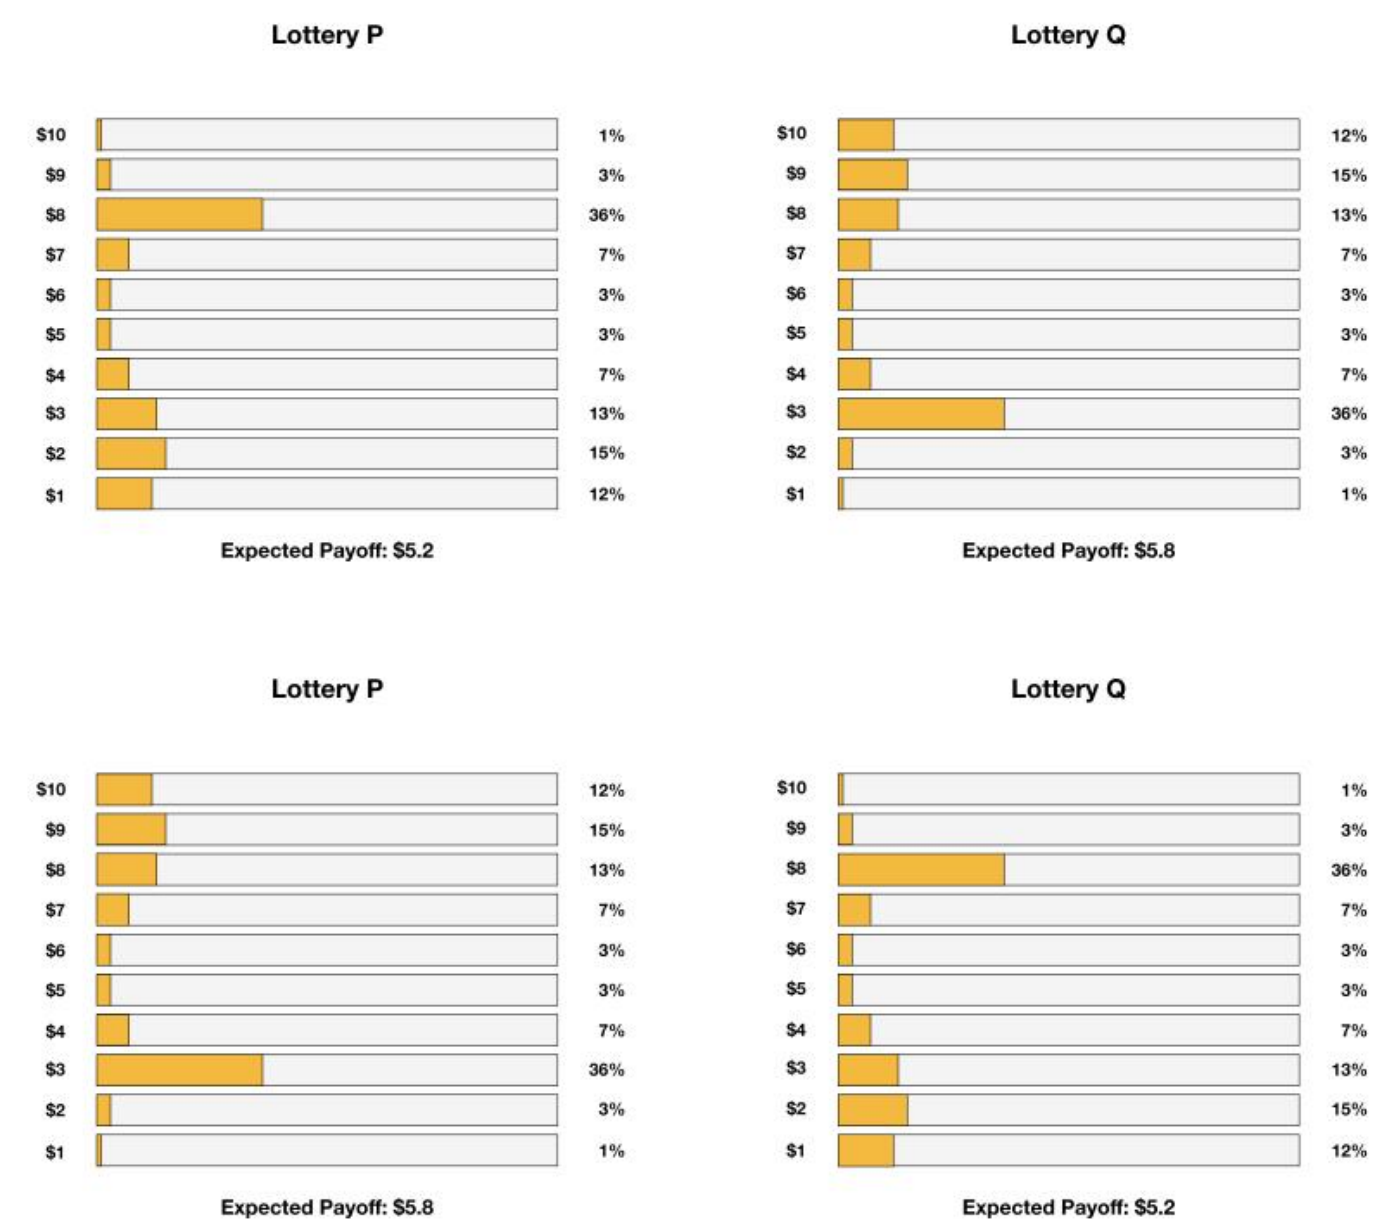

Which lottery do you prefer to participate?

☐ Lottery P

06

## demographic

Now please answer the following demographic questions:

What is the highest level of school you have completed or the highest degree you have received?

- ☐ Less than high school degree
- ☐ High school graduate (high school diploma or equivalent including GED)
- ☐ Some college but no degree
- ☐ Associate degree in college (2-year)
- ☐ Bachelor's degree in college (4-year)
- ☐ Master's degree
- ☐ Doctoral degree
- ☐ Professional degree (JD, MD)

How often do you use social media?

- ☐ Never
- ☐ Less than Once a Month
- ☐ Once a Month
- ☐ 2-3 Times a Month
- ☐ Once a Week
- ☐ 2-3 Times a Week
- ☐ Daily

Information about income is very important to understand. Would you please give your best guess? Please indicate the answer that includes your entire household income in (previous year)

before taxes.

- ☐ Less than \$10,000
- ☐ \$10,000 to \$29,999
- ☐ \$30,000 to \$49,999
- ☐ \$50,000 to \$69,999
- ☐ \$70,000 to \$89,999
- ☐ \$90,000 to \$149,999
- ☐ \$150,000 or more

What is your gender?

What is your age?

If you would like to leave any comments about this study, please do so below. You may also leave this blank.

Please click the arrow below to record your responses and receive credit for participation.
